# Supplementary material for: Mckelveyite group minerals – Part 1: Nomenclature and new data on donnayite-(Y)
Source: Copernicus journal article supplement (doi:10.5194/ejm-35-133-2023), 2023-02-28
Supplement: Supplementary file [file ejm-35-133-2023-supplement-title-page.pdf › ejm-35-133-2023-supplement-title-page.pdf]

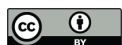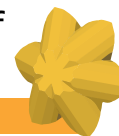

*Supplement of*

## **Mckelveyite group minerals – Part 1: Nomenclature and new data on donnayite-(Y)**

**Inna Lykova et al.**

*Correspondence to:* Inna Lykova (ilykova@nature.ca)

- ejm-35-133-2023-supplement-title-page.pdf
- Table S1.docx
- donnayite-(Y).cif
- donnayite-(Y)\_PXRD\_pattern\_K-alpha-1.xy

The copyright of individual parts of the supplement might differ from the article licence.
